# Supplementary material
Source: Springer Nature journal article supplement (https://www.springermedizin.de/resource/supplementary/12874_2003_42_MOESM6_ESM.pdf/9433644)
Supplement: MOESM6 [file 9433644]

**Figure 3:** Flow 2, from abstract acceptance to subsequent publication. Meeting characteristics associated with full publication.

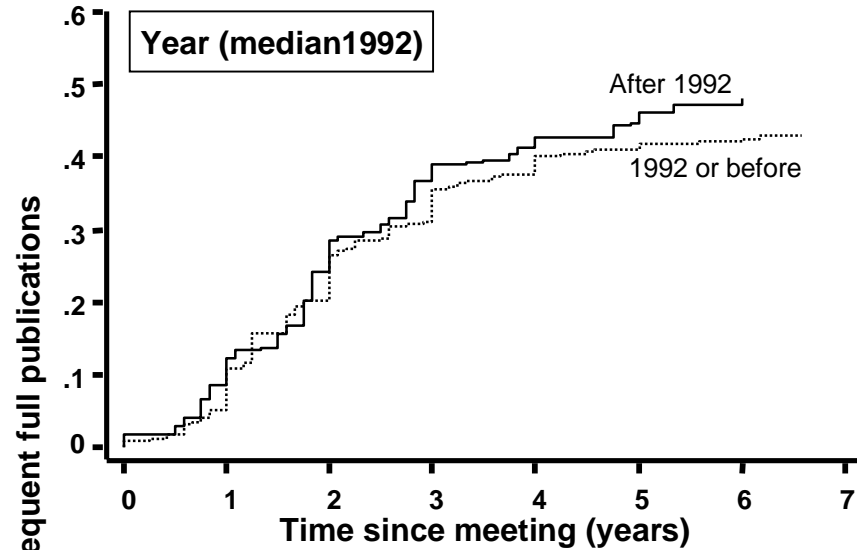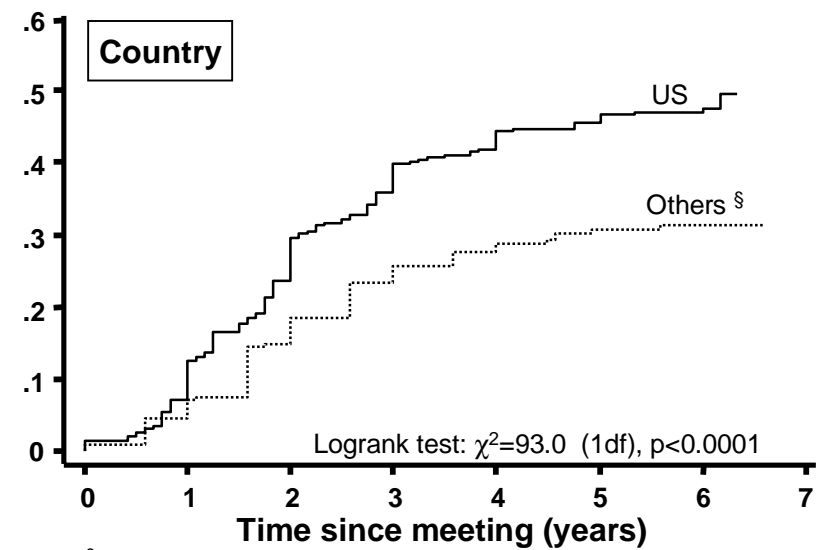

§ Australia, Belgium, Canada, Croatia, France, Germany, Greece, Ireland, Japan, Mexico, Netherlands, Spain, UK

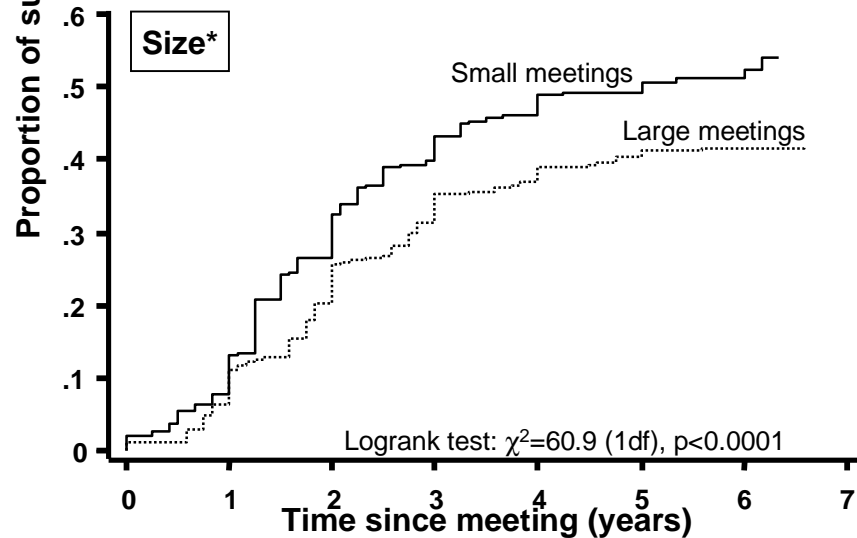

\*Large (small) meetings have > (<=) abstracts than the median number (109) of abstracts for all meetings

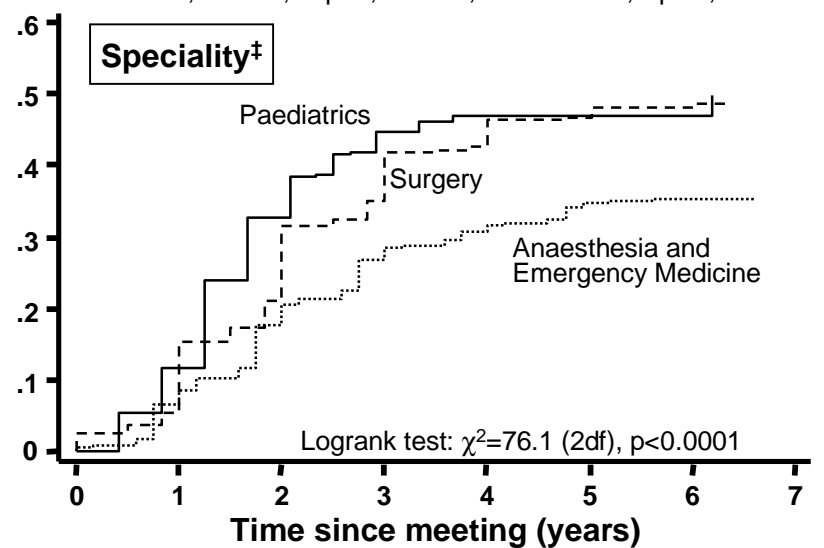

‡ Only specialities with ≥15 meetings are included
